# Supplementary material for: Integrating Pharmacology and Gut Microbiota Analysis to Explore the Mechanism of Citri Reticulatae Pericarpium Against Reserpine-Induced Spleen Deficiency in Rats
Source: Front Pharmacol. 2020 Oct 20;11:586350. doi: 10.3389/fphar.2020.586350 (PMC7606944; doi:10.3389/fphar.2020.586350)
Supplement: Supplementary file 2 [file Table1_v1.xlsx]

## Sheet: Sheet1
Table S1 Detailed information for CRP-related target-spleen deficiency target network
No.	Spleen deficiency-related disease targets	CRP’s efficacy-related targets	Common Targets
1	A4GNT	ASNS	ABCB1
2	ABCB1	CYP1A1	AKT1
3	ABCB11	DDIT3	BCL2
4	ABCB4	TXNIP	CYP1A2
5	ABCC2	ABCB1	FOS
6	ABCC8	ABCC1	ABCG2
7	ABCG2	CCNA2	KIT
8	ABL1	CCNE2	MET
9	ACE	DEPDC1	MMP2
10	ACOT8	E2F8	EGFR
11	ACSF3	KIF11	PTGS2
12	ADA	MMP7	OPRM1
13	ADAM17	SLC6A9	TNF
14	ADGRL1	TMEM116	HMOX1
15	ADGRL2	TRIB3	NOS2
16	ADRM1	AKT1	IL10
17	AFA	BAX	IL1B
18	AGA	BCL2	IL6
19	AGT	CD74	TERT
20	AGTR1	CYP1A2	PPARG
21	AHSA1	CYP1B1	TGFB1
22	AICDA	FOS	LEPR
23	AIM2	GRIN1	GPT
24	AIMP2	GRIN2A	MMP9
25	AIRE	GRIN2B	CDKN1A
26	AK2	H1-5	MPO
27	AKR1D1	H1F5	CXCL8
28	AKT1	ABCG2	IFNG
29	ALAD	ADORA1	LEP
30	ALG3	ADORA2A	MAPK1
31	ANKS1B	AKR1B1	STAT1
32	ANTXR2	OPRD1	CCL2
33	AP1S1	PLG	CDKN1B
34	APEX1	ADORA3	CSF3
35	APOE	KIT	CXCL1
36	ARHGAP24	FLT3	CYP2C19
37	ARID1A	CA2	IL1A
38	ARX	CA7	IL4
39	ATN1	GSK3B	NFKB1
40	ATP12A	SYK	NR1I2
41	ATP4A	NOX4	PIK3R1
42	ATP6	ALOX5	TNC
43	ATP8B1	PIM1	TP53
44	AVP	PTPRS	HIF1A
45	AZI2	CDK5R1 CDK5	NFKBIA
46	BAG1	GLO1	VEGFA
47	BCL10	AKR1B10	UGT1A1
48	BCL2	TOP1	CYP3A4
49	BDNF	ARG1	CFTR
50	BLM	CA12	SELE
51	BLNK	TNKS	ATP6
52	BMS1	PARP1	JUN
53	BRAF	TNKS2	MMP1
54	BTD	AMY1A	SCNN1A
55	BTK	GRK6	STAT3
56	CA5A	PLK1	ACE
57	CASR	MET	APOE
58	CAV1	MMP2	BDNF
59	CAV2	MAOA	CD40LG
60	CCKBR	CCNB3 CDK1 CCNB1 CCNB2	CDKN2C
61	CCL2	APP	DGAT1
62	CCL20	CA1	ERBB2
63	CCR6	CA13	LTF
64	CD14	CDK1	POU5F1
65	CD19	KDR	PROM1
66	CD3D	ESR2	PSCA
67	CD40LG	KDM4E	TP73
68	CD44	ALOX12	UGT1A7
69	CD55	EGFR	UGT1A8
70	CD69	PTGS2	UGT1A9
71	CD79A	OPRM1	NME1
72	CD79B	CSNK2A1	SI
73	CDA	SRC	CPT1A
74	CDC42	ACHE	PTGS1
75	CDH1	NFE2L2	SERPINE1
76	CDKN1A	RELA	SPP1
77	CDKN1B	TNF	UCP1
78	CDKN2A	HMOX1	ABCC2
79	CDKN2B	KEAP1	CDH1
80	CDKN2C	NOS2	CSF2
81	CDRT1	NQO1	CXCL10
82	CDT1	CASP3	FOSB
83	CDX1	CAT	IL17A
84	CEACAM5	CYB5A	JUNB
85	CES1	GSR	JUND
86	CES2	IL10	CA5A
87	CFH	IL1B	ODC1
88	CFTR	IL6	CES1
89	CHN1	PKM	CES2
90	CHPT1	TERT	HPGDS
91	CHST2	CA4	MMP3
92	CLCN5	IGF1R	TOP2A
93	CLDN2	INSR	APEX1
94	COL3A1	ALK	TTR
95	COMT	PPARG	MIF
96	COX2	TGFB1	NR3C2
97	CPB1	LEPR	VDR
98	CPB2	PTEN	SULT2A1
99	CPE	ACTA2
100	CPOX	COL1A1
101	CPP	GPT
102	CPT1A	MAPK8
103	CR2	MMP9
104	CRH	TAS1R3
105	CRK	ABCC4
106	CSF2	AHR
107	CSF3	CCND1
108	CST2	CDKN1A
109	CTLA4	G6PD
110	CTSB	HAVCR1
111	CXCL1	ICAM1
112	CXCL10	MPO
113	CXCL8	SLCO2B1
114	CXCR5	VCAM1
115	CYLC2	ABCC5
116	CYLD	AFP
117	CYP11B2	ALB
118	CYP1A2	CASP9
119	CYP27A1	CCL3
120	CYP2A6	CDK2
121	CYP2B6	CDK4
122	CYP2C19	CXCL8
123	CYP2D6	CYCS
124	CYP3A4	HRH1
125	CYP7B1	IFNG
126	DCLRE1C	JAK1
127	DDC	LEP
128	DEFB1	MAPK1
129	DEFB103B	MAPK3
130	DEFB4A	MYC
131	DEFB4B	PCNA
132	DES	PPARGC1A
133	DGAT1	SIRT6
134	DHDDS	STAT1
135	DHFR	TAS1R2
136	DNMT3B	ADIPOQ
137	DPYD	BMP2
138	DUSP1	CASP8
139	EBI3	CCL2
140	EGFR	CCL5
141	ELP1	CDKN1B
142	ENTPD1	CEBPA
143	EPCAM	CSF3
144	ERBB2	CXCL1
145	ERVK-11	CYP19A1
146	ERVK-19	CYP2C19
147	ERVK-9	CYP2C9
148	F12	CYP2E1
149	F2RL1	FABP4
150	FAAH	FASN
151	FAP	GCK
152	FBXW10	HMGCR
153	FCGR3A	HP
154	FCGR3B	IL1A
155	FGF19	IL4
156	FGFR4	LPL
157	FHIT	MAPK9
158	FOS	NFKB1
159	FOSB	NR1I2
160	FOXP3	ORM1
161	GALT	PIK3R1
162	GAST	POR
163	GATA6	RETN
164	GCG	SGPP2
165	GDE1	SHBG
166	GHRH	SLC16A1
167	GHRL	SLC2A2
168	GIF	SLC2A4
169	GLA	SOD1
170	GLB1	SOD2
171	GLP2R	SPHK1
172	GNAS	TFEB
173	GNB3	TNC
174	GNS	TNFRSF25
175	GPNMB	TP53
176	GPT	TRADD
177	GRAP2	TRPM3
178	GSTK1	UTRN
179	GSTT1	HIF1A
180	GUCY2C	ESR1
181	HADH	NFKBIA
182	HAMP	TNFSF10
183	HGF	IKBKB
184	HGSNAT	VEGFA
185	HIF1A	UGT1A1
186	HLA-B	CYP3A4
187	HLA-DQA1	GCLC
188	HLA-DQB1	HSPA5
189	HMBS	ATG7
190	HMGCS2	BCL2L1
191	HMOX1	BECN1
192	HNF1A	CCNB1
193	HNF4A	CFTR
194	HPGDS	CXCL12
195	HSD3B7	GCLM
196	HT	INS1
197	HTR3A	MAP1LC3B
198	HTR3E	MCL1
199	ICOS	NOS3
200	IDS	SELE
201	IFNA2	APAF1
202	IFNG	ARNT
203	IGH	ATF6
204	IGHM	ATP6
205	IGLL1	ATP8
206	IKZF1	BIRC3
207	IL10	CASP12
208	IL11	CASP7
209	IL15	CCN5
210	IL17A	CHUK
211	IL17D	COX17
212	IL17F	DHRS11
213	IL18	EP300
214	IL1A	ERN1
215	IL1B	FAS
216	IL1RL1	FGF2
217	IL1RN	GLI1
218	IL22	GYPA
219	IL32	HSP90B1
220	IL4	HSPA8
221	IL6	JUN
222	IL6ST	MKI67
223	IL7R	MMP1
224	INS	PGR
225	IRAK1	SCNN1A
226	ITGAX	SLCO1B1
227	JAK3	STAT3
228	JPT1	TNFRSF10B
229	JUN	TP53I3
230	JUNB	UGT2B15
231	JUND	XDH
232	KCNJ1	A2M
233	KCNJ11	ABCA1
234	KCNQ5	ACE
235	KIT	AFG3L2
236	KITLG	AIP
237	KLB	AKR1C3
238	KLF5	APOE
239	KLHL1	ARHGAP29
240	KLK4	B3GALT5
241	KRT20	BDNF
242	KRT8	BID
243	L1TD1	BIRC2
244	LCK	BNIP3L
245	LCT	CASP1
246	LEP	CD40
247	LEPR	CD40LG
248	LGALS3	CDC25C
249	LGR5	CDKAL1
250	LILRB1	CDKN2C
251	LIPA	CEBPB
252	LRBA	CKM
253	LRPPRC	CLCA1
254	LRRC8A	CYP11B1
255	LTBR	CYP17A1
256	LTF	CYP21A2
257	LYZ	DGAT1
258	MADCAM1	DHCR24
259	MAP3K7	DRD2
260	MAPK1	DUOX1
261	MAPK14	EIF5B
262	MARCH5	ERBB2
263	MBD3	ERP29
264	MBL2	F2
265	MCM5	FBP1
266	MCM6	FN1
267	MEFV	FRMD4A
268	MEN1	FSHB
269	MET	FYN
270	MFT2	GDNF
271	MIF	GPX1
272	MIP	GSTA4
273	MIR146A	HBEGF
274	MIR150	HSD17B1
275	MIR193B	HSD3B2
276	MIR203A	HSPA1A
277	MIR210	HSPA1B
278	MIR29A	HSPA1L
279	MIR370	HSPA2
280	MIR490	IDH3A
281	MIR494	KDM3A
282	MIR499A	LAMB2
283	MIR510	LHB
284	MIR650	LMBR1L
285	MIR7-1	LRRC26
286	MIR9-1	LTBP1
287	MIRLET7C	LTF
288	MLH1	LYN
289	MLYCD	MIB1
290	MME	MMP13
291	MMP1	NANOG
292	MMP2	NDUFA4
293	MMP3	NEO1
294	MMP9	NFAT5
295	MPI	NFKB2
296	MPO	NFKBIB
297	MPV17	NR1H3
298	MSH2	NR1H4
299	MTHFR	P2RX7
300	MUC1	PANK2
301	MUC5AC	PKMYT1
302	MUC6	PLA2G2A
303	MVK	POLR2H
304	MYO5B	POU5F1
305	NAA25	PPARA
306	NAGLU	PPID
307	NAP1L1	PRKAA1
308	NAPSA	PROM1
309	NBN	PRPSAP1
310	NCF4	PSCA
311	NCKAP1	PTK2B
312	NEUROG3	PYCARD
313	NFKB1	RANBP10
314	NFKBIA	RPS6KB1
315	NHS	S1PR1
316	NM	S1PR2
317	NME1	S1PR3
318	NOD1	SDHA
319	NOD2	SF3B2
320	NOS2	SLAIN2
321	NPR3	SLC2A3
322	NR0B2	SLC5A1
323	NR1I2	SLCO1B3
324	NR2C2	SLF2
325	NR3C2	SNCA
326	NR4A3	SOCS3
327	NRAS	SOX2
328	NT5E	SPTBN1
329	NXPH1	SREBF1
330	ODC1	SULT1A1
331	OPLAH	SULT1E1
332	OPRM1	TECR
333	OR2AG1	TFPT
334	OXA1L	TH
335	PCSK1	TP63
336	PDR	TP73
337	PDX1	TUBB5
338	PDZD3	TYR
339	PEBP1	UGT1A10
340	PER2	UGT1A7
341	PGA3	UGT1A8
342	PGC	UGT1A9
343	PHKB	UQCRQ
344	PIGR	USP48
345	PIGT	ZCRB1
346	PIK3R1	ZFP110
347	PLA2G4A	ZFP809
348	PLCE1	ZFP941
349	PMM2	ZFP957
350	POLA1	KCNH2
351	POLDIP2	GPER1
352	POLG	PPARB
353	POU5F1	ALPL
354	PPARG	AQP1
355	PPP1R2C	AQP5
356	PPRC1	ARHGDIA
357	PRM3	CCNE1
358	PRNP	DHRS12
359	PROM1	GPX2
360	PRSS57	GPX5
361	PRTN3	GPX7
362	PSCA	GSTZ1
363	PTGDR2	LPO
364	PTGDS	LRRC27
365	PTGS1	NFKBIL1
366	PTGS2	NME1
367	PTPRC	PRDX1
368	PYY	RPTOR
369	RAG1	SI
370	RAG2	SLC2A1
371	RAPGEF3	ACAT1
372	RB1	AKR1C1
373	RECQL4	BACE1
374	REG4	BAK1
375	REM1	BCHE
376	RET	CPT1A
377	RFX6	CTSD
378	RNF19A	GPX3
379	RNF2	MAP3K5
380	RRM2B	PGD
381	RTL10	PON1
382	RUNX3	PRKCA
383	S100A10	PRKCB
384	S100A8	PRKCG
385	S100A9	PSEN2
386	SAA@	PTGS1
387	SAA1	SERPINE1
388	SAR1B	SNAI1
389	SARS	SNAI2
390	SAT1	SPP1
391	SCN11A	ST1A8
392	SCN5A	SULT1A3
393	SCN9A	TPO
394	SCNN1A	UCP1
395	SCNN1B	MITF
396	SCNN1G	IL8
397	SCT	DCT
398	SDCBP2	TYRP1
399	SELE	EGF
400	SELL	IRF3
401	SERPINB2	PTK2
402	SERPINE1	TRP53
403	SERPING1	DRAM1
404	SETD1A	ABCC2
405	SETD2	CDH1
406	SFRP5	CDH2
407	SGSH	CSF2
408	SH2D3C	CXCL10
409	SHH	CXCL9
410	SI	GADD45B
411	SKIV2L	IFNB1
412	SLC10A2	IL12B
413	SLC12A1	IL27
414	SLC12A3	SFN
415	SLC17A5	TBK1
416	SLC19A2	UGT1A3
417	SLC26A2	AGER
418	SLC26A3	CYP3A5
419	SLC26A4	EGR1
420	SLC35A2	FOSB
421	SLC39A4	GFAP
422	SLC45A2	GPR35
423	SLC46A1	IL13
424	SLC52A1	IL17A
425	SLC6A4	IL3
426	SLC7A7	IL5
427	SLC9A1	JUNB
428	SLC9A3	JUND
429	SLC9A3R1	MAPK10
430	SLC9A3R2	MDM2
431	SLC9A6	NLRP1A
432	SLC9A8	NR1D1
433	SLCO6A1	P2RX4
434	SLPI	TNFAIP3
435	SMO	TXNRD1
436	SMOX	VAV3
437	SOX9	XIAP
438	SPARC	TAS2R31
439	SPI1	CBR1
440	SPINT2	MAOB
441	SPP1	CA3
442	SSTR3	MMP12
443	ST2	CA6
444	ST8SIA2	CA5A
445	STAT1	KLK1
446	STAT3	KLK2
447	STAT5A	PLA2G1B
448	STAT5B	GRM5
449	STX1A	POLB
450	STX2	CA5B
451	STX3	PLA2G5
452	SUGCT	PLA2G10
453	SULT2A1	CA9
454	SYCE1L	FFAR1
455	TAB3	GRM2
456	TAC1	FGFR1
457	TACR1	CHRNA7
458	TBC1D9	DNMT1
459	TBCA	ST3GAL3
460	TCF3	FUT7
461	TCN2	FUT4
462	TDH	SQLE
463	TERT	RXRA
464	TFF1	ODC1
465	TFF2	CHEK1
466	TGFB1	CES1
467	THBS1	MAP4K4
468	TIMP1	EDNRA
469	TJP1	CDC7
470	TLR2	CES2
471	TLR3	SLC5A2
472	TLR4	PNP
473	TLR8	HPGDS
474	TMPRSS15	CDK2 CCNA1 CCNA2
475	TNC	SGK1
476	TNF	GABRA1 GABRB2 GABRG2
477	TNFRSF11B	OPRK1
478	TNFRSF13B	AURKA
479	TNFRSF13C	DUSP3
480	TNFRSF1A	ECE1
481	TNFSF15	GUSB
482	TNMD	DYRK1A
483	TOP2A	CDK1 CCNB1
484	TP53	CCNE1 CDK2
485	TP53INP1	NTRK1
486	TP73	MMP3
487	TPH1	HSD17B2
488	TPH2	PRMT1
489	TREH	DNM1
490	TRH	MMP8
491	TRMO	MPL
492	TRPV1	MMP14
493	TSHR	PIK3CG
494	TSLP	ALOX15
495	TTC37	CDK6
496	TTR	MPG
497	TXNDC5	AURKB
498	TYMP	DAPK1
499	TYMS	SLC22A12
500	UCN	ST6GAL1
501	UCP1	MYLK
502	UCP2	CA14
503	UGT1A	PKN1
504	UGT1A1	MAPT
505	UGT1A7	TOP2A
506	UGT1A8	PYGL
507	UGT1A9	APEX1
508	UGT2B7	AKR1C2
509	UMPS	AKR1C4
510	USE1	AKR1A1
511	VDR	ESRRA
512	VEGFA	PFKFB3
513	VMA21	AVPR2
514	WNT5A	CAMK2B
515	XBP1	NEK2
516	XRCC1	CD38
517	ZAP70	TTR
518	ZIC3	CXCR1
519	ZNRD1	AXL
520	ZYX	NEK6
521		NUAK1
522		HSP90AB1
523		HSP90AA1
524		DRD4
525		NTRK2
526		CALM1
527		RNASE1
528		MIF
529		TPI1
530		GABRD
531		GABRE
532		TOP2B
533		SULT2B1
534		DHFRL1
535		CLEC4E
536		GABRP
537		GABRQ
538		NR1I3
539		LSS
540		CACNA1C
541		CACNA1D
542		CACNA1F
543		LIP3
544		GABRA1
545		GABRA2
546		GABRA3
547		GABRA4
548		GABRA5
549		GABRA6
550		GRIN3A
551		GRIN3B
552		CACNA1S
553		NCOA2
554		METAP2
555		NR3C1
556		GABRG1
557		NR3C2
558		GABRG2
559		GABRG3
560		VDR
561		SOAT1
562		SOAT2
563		TRPA1
564		TRPV3
565		SULT2A1
566		CACNB1
567		CACNB2
568		CACNB3
569		CACNB4
570		PYGM
571		SIGMAR1
572		GABRB1
573		MTTP
574		GABRB2
575		GABRB3
576		GRIN2C
577		GRIN2D
578		ADH1B
579		TRPM8
580		RORA
581		ALDH2
582		UGT3A1
583		AR
